# Supplementary material for: Statistical tools for synthesizing lists of differentially expressed features in related experiments
Source: Springer Nature journal article supplement (doi:10.1186/gb-2007-8-4-r54), 2007-04-11

# **Statistical tools for synthesizing lists of differentially expressed features in related experiments**

Marta Blangiardo\*<sup>1</sup> and Sylvia Richardson<sup>1</sup>

<sup>1</sup>Centre for Biostatistics, Imperial College. St. Mary's Campus, Norfolk Place London W2 1PG, UK

Email: Marta Blangiardo\* - [m.blangiardo@imperial.ac.uk](mailto:m.blangiardo@imperial.ac.uk);

\*Corresponding author

## Additional Results

**Table 1: Performance on simulated data**

Average simulation results: we show the results from the joint model on 3 cases of simulated data under Scenario I for two associated experiments. We present two decision rules:  $q_{max}$  and  $q_2$ . We define  $q_{max} = \arg \max\{Median(R(q) | \mathbf{O}, n)\}$  over the set of values of  $q$  for which  $CI_{95}(q)$  excludes 1} and  $q_2 = \max\{\text{over the set of values of } q \text{ for which } CI_{95}(q) \text{ excludes 1 and } Median(R(q) | \mathbf{O}, n) \geq 2\}$ . We average the results over 50 repeats for each case.

| Scenario I: n=3000,common=700, DE1=1000, DE2=800                                 |                  |      |      |           |                 |                 |                 |          |            |            |             |            |
|----------------------------------------------------------------------------------|------------------|------|------|-----------|-----------------|-----------------|-----------------|----------|------------|------------|-------------|------------|
| Parameters                                                                       | Rules            | q    | R    | CI%95     | O <sub>11</sub> | O <sub>1+</sub> | O <sub>+1</sub> | FP (%)   | TP (%)     | FN (%)     | TN (%)      | Glob. Err. |
| Case A3<br>Ga(2.5,0.4);<br>$r_1 = 1, r_2 = 1.5$<br>Signal to noise ratio = $5^b$ | max              | 0.01 | 2.88 | 2.76-3.02 | 462             | 850             | 565             | 3 (0.1)  | 459 (65.6) | 241 (34.4) | 2297 (99.9) | 244        |
|                                                                                  | double           | 0.08 | 2.01 | 1.94-2.09 | 588             | 1067            | 823             | 41 (1.7) | 547 (78.1) | 153 (21.9) | 2259 (98.3) | 194        |
| Case A4<br>Ga(2,0.5);<br>$r_1 = 1.5, r_2 = 2$<br>Signal to noise ratio = $2.3^b$ | max              | 0.01 | 4.13 | 3.83-4.46 | 187             | 478             | 284             | 2 (0.1)  | 185 (86.4) | 515 (73.6) | 2298 (99.9) | 517        |
|                                                                                  | double           | 0.09 | 2.02 | 1.91-2.13 | 348             | 829             | 624             | 39 (1.7) | 309 (13.4) | 391 (55.8) | 2261 (98.3) | 430        |
| Case A5<br>Ga(1.5,0.6);<br>$r_1 = 3, r_2 = 6$<br>Signal to noise ratio = $0.7^b$ | max <sup>d</sup> | 0.04 | 1.57 | 1.07-2.18 | 16              | 216             | 141             | 4 (0.2)  | 12 (1.7)   | 688 (98.3) | 2296 (99.8) | 692        |

<sup>a</sup> All the CIs contain 1, so no genes are called in common. Hence there are no FP.

<sup>b</sup> The signal to ratio is calculated as  $E(Ga(shape, 1/scale))/(r_1/2 + r_2/2)$

<sup>c</sup> Minimum global error (observed)

<sup>d</sup> There is no ratio larger than 2 and only the maximum rule has been reported

**Table 2: Performance of Hwang's method on simulated data**

Average simulation results: we present the results from Hwang's method on 3 cases of simulated data under Scenario I for associated experiments. We use the Fisher's weighted F defined as

$$F_g = -2\sum_{k=1}^2 w_k \ln(p_{gk})$$

where  $w_k$  is the weight for the  $k^{th}$  experiment and  $p_{gk}$  is the  $p$ -value for the gene  $g$

in the experiment  $k$ . We present the non parametric rule to select the differentially expressed genes, as

suggested by the authors. The method is implemented in Matlab. In the last column we report the Global Error (FP+FN) of our procedure for  $q_2$  (cfr. Table 1) for ease of comparison.

| Scenario A: n=3000,common=700, DE1=1000, DE2=800 |      |      |            |            |            |             |           |                    |
|--------------------------------------------------|------|------|------------|------------|------------|-------------|-----------|--------------------|
|                                                  | DE   | n-DE | FP (%)     | TP (%)     | FN (%)     | TN (%)      | Glob.Err. | Glob.Err. $R(q_2)$ |
| Case A3                                          | 1012 | 1988 | 386 (16.8) | 626 (89.4) | 74 (10.6)  | 1914 (83.2) | 460       | 194                |
| Case A4                                          | 700  | 2300 | 267 (11.6) | 433 (61.8) | 267 (38.2) | 2033 (88.4) | 534       | 430                |
| Case A5                                          | 347  | 2653 | 208 (9.0)  | 139 (19.8) | 561 (80.2) | 2092 (91.0) | 769       | 692 <sup>a</sup>   |

<sup>a</sup>: there is no ratio larger than 2 so the maximum rule has been used in this case

**Figure 1: Average results from a batch of 50 simulations: associated experiments, large noise and small true differences (Case A5)**

The two associated experiments are simulated from Scenario A with true differences drawn from a  $\text{Ga}(1.5, 0.67)$  and noise experiment specific of 3 and 6 respectively (signal to noise ratio = 0.7).

The upper plots show the distribution of  $T(q)$  (left) and  $R(q)$  with Bayesian Credibility Intervals at 95% (right). Starting from the right,  $T(q)$  deviates from 1 around a  $p$ -value of 0.07 and reaches a peak of 1.7 at  $q = 0.03$  and then decreases.  $R(q)$  presents the same trend, but the CIs for small  $p$ -values show great variability of the lists and include 1. This is clearer in the blow-up plot for  $p$ -values between 0 and 0.2 (bottom, right): the credibility interval for  $q=0.03$  includes 1, so it is not significant; the maximum over all the other intervals is attained at  $q_{max} = 0.04$  and  $R(q_{max}) = 1.57$  (recall that  $q_{max} = \arg \max\{\text{Median}(R(q) \mid \mathbf{O}, n)\}$  over the set of values of  $q$  for which  $CI_{95}(q)$  excludes 1}).

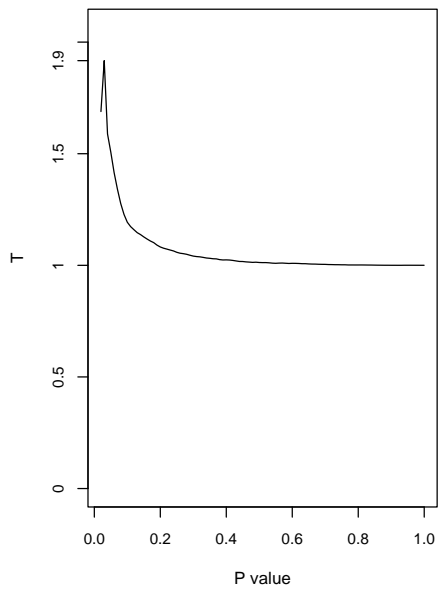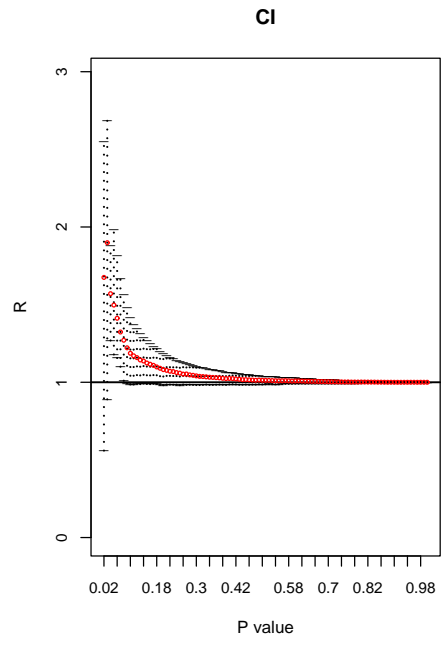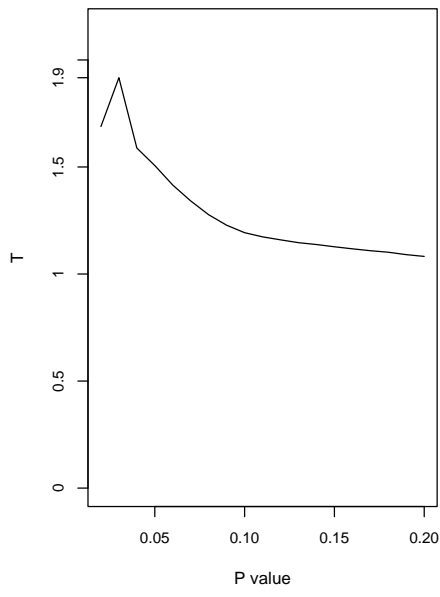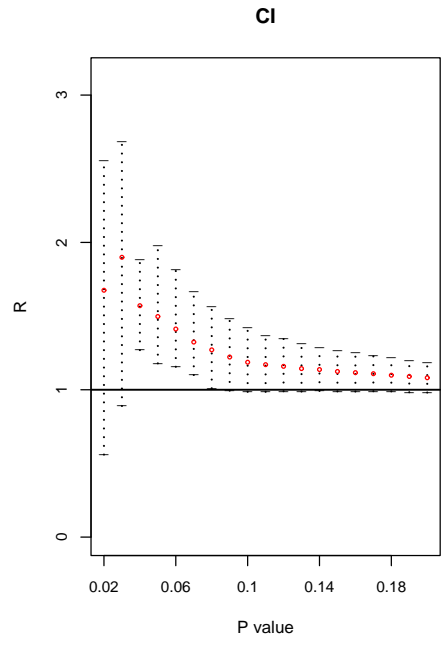

**Table 3: Performance on simulated data for Scenario II**

Average simulation results: from the joint model on six cases of simulated data for two associated experiments. The simulation scenario consists of 2 groups of genes: differentially expressed in both experiments and differentially expressed in neither experiment. We present two decision rules: the threshold associated with the maximum  $R(q)$  is  $q_{max}$  and the threshold associated with the  $R(q) \geq 2$  is  $q_2$  (called ‘double’ in the table). We define  $q_{max} = \arg \max\{Median(R(q) | \mathbf{O}, n)\}$  over the set of values of  $q$  for which  $CI_{95}(q)$  excludes 1} and  $q_2 = \max\{$  over the set of values of  $q$  for which  $CI_{95}(q)$  excludes 1 and  $Median(R(q) | \mathbf{O}, n) \geq 2\}$ . We average the results over 50 repeats for each case.

| A: n=3000,common=700                                   |        |      |       |             |                 |                 |                 |          |            |            |              |                                     |
|--------------------------------------------------------|--------|------|-------|-------------|-----------------|-----------------|-----------------|----------|------------|------------|--------------|-------------------------------------|
| Parameters                                             | Rules  | q    | R     | CI95%       | O <sub>11</sub> | O <sub>1+</sub> | O <sub>+1</sub> | FP (%)   | TP (%)     | FN (%)     | TN (%)       | Glob.Err.                           |
| Case A1<br>Signal to noise<br>ratio = 9.6 <sup>b</sup> | max    | 0.01 | 4.12  | 3.93-4.33   | 622             | 699             | 650             | 0 (0.0)  | 622 (88.9) | 78 (11.1)  | 2300 (100.0) | 78                                  |
|                                                        | double | 0.14 | 2.11  | 2.04-2.19   | 711             | 994             | 1015            | 44 (1.9) | 667 (95.3) | 33 (4.7)   | 2256 (98.1)  | 77<br><i>Min<sup>c</sup> = 57</i>   |
| Case A2<br>Signal to noise<br>ratio = 1.6 <sup>b</sup> | max    | 0.01 | 8.11  | 7.31-9.06   | 101             | 246             | 150             | 0 (0.0)  | 101 (14.4) | 599 (85.6) | 2300 (100.0) | 599                                 |
|                                                        | double | 0.13 | 2.03  | 1.92-2.13   | 271             | 671             | 598             | 40 (1.7) | 231 (33.0) | 469 (67.0) | 2260 (98.3)  | 509<br><i>Min<sup>c</sup> = 501</i> |
| B: n=3000,common=200                                   |        |      |       |             |                 |                 |                 |          |            |            |              |                                     |
| Parameters                                             | Rules  | q    | R     | CI95%       | O <sub>11</sub> | O <sub>1+</sub> | O <sub>+1</sub> | FP (%)   | TP (%)     | FN (%)     | TN (%)       | Glob.Err.                           |
| Case B1<br>Signal to noise<br>ratio = 9.6 <sup>b</sup> | max    | 0.01 | 11.16 | 10.26-12.60 | 179             | 226             | 212             | 0 (0.0)  | 179 (89.5) | 21 (10.5)  | 2800 (100.0) | 21                                  |
|                                                        | double | 0.14 | 2.08  | 1.93-2.22   | 229             | 589             | 562             | 41 (1.5) | 188 (94.0) | 12 (6.0)   | 2759 (98.5)  | 53<br><i>Min<sup>c</sup> = 19</i>   |
| Case B2<br>Signal to noise<br>ratio = 1.6 <sup>b</sup> | max    | 0.01 | 12.42 | 9.66-16.59  | 25              | 91              | 66              | 0 (0.0)  | 25 (12.5)  | 175 (87.5) | 2800 (100.0) | 175                                 |
|                                                        | double | 0.11 | 2.06  | 1.80-2.33   | 112             | 432             | 390             | 25 (0.9) | 87 (43.5)  | 113 (56.5) | 2775 (99.1)  | 138<br><i>Min<sup>c</sup> = 138</i> |
| C: n=3000,common=100                                   |        |      |       |             |                 |                 |                 |          |            |            |              |                                     |
| Parameters                                             | Rules  | q    | R     | CI95%       | O <sub>11</sub> | O <sub>1+</sub> | O <sub>+1</sub> | FP (%)   | TP (%)     | FN (%)     | TN (%)       | Glob.Err.                           |
| Case C1<br>Signal to noise<br>ratio = 9.6 <sup>b</sup> | max    | 0.01 | 17.38 | 15.04-19.84 | 89              | 134             | 113             | 0 (0.0)  | 89 (89.0)  | 11 (11.0)  | 2900 (100.0) | 11                                  |
|                                                        | double | 0.12 | 2.09  | 1.88-2.29   | 150             | 472             | 460             | 53 (1.8) | 97 (97.0)  | 3 (3.0)    | 2847 (98.2)  | 56<br><i>Min<sup>c</sup> = 7</i>    |
| Case C2<br>Signal to noise<br>ratio = 1.6 <sup>b</sup> | max    | 0.01 | 11.99 | 7.60-18.15  | 11              | 61              | 44              | 0 (0.0)  | 11 (11.0)  | 89 (89.0)  | 2900 (100.0) | 89                                  |
|                                                        | double | 0.05 | 2.02  | 1.37-2.47   | 22              | 187             | 177             | 3 (0.1)  | 19 (19.0)  | 81 (81.0)  | 2897 (99.9)  | 84<br><i>Min<sup>c</sup> = 84</i>   |

<sup>b</sup> The signal to ratio is calculated as  $E(Ga(shape, 1/scale))/(r_1/2 + r_2/2)$

<sup>c</sup> Minimum global error (observed)

**Table 4: Performance of Hwang’s method on simulated data for Scenario II**

Average simulation results: we present the results from Hwang’s method on the simulated data under Scenario II. We use the Fisher’s weighted F defined as  $F_g = -2\sum_{k=1}^2 w_k \ln(p_{gk})$  where  $w_k$  is the weight for the  $k^{th}$  experiment and  $p_{gk}$  is the  $p$ -value for the gene  $g$  in the experiment  $k$ . We present the non parametric rule to select the differentially expressed genes, as suggested by the authors. The method is implemented in Matlab. In the last column we report the Global Error (FP+FN) of our procedure for  $q_2$  (see Table 4) for ease of comparison.

| A: n=3000,common=700 |     |      |           |            |            |             |             |                    |
|----------------------|-----|------|-----------|------------|------------|-------------|-------------|--------------------|
|                      | DE  | nDE  | FP (%)    | TP (%)     | FN (%)     | TN (%)      | GlobalError | GlobalErr $R(q_2)$ |
| Case A1              | 753 | 2247 | 73 (3.2)  | 680 (97.2) | 20 (2.8)   | 2227 (96.8) | 92          | 77                 |
| Case A2              | 430 | 2570 | 90 (3.9)  | 340 (48.6) | 360 (51.4) | 2210 (96.1) | 450         | 509                |
| B: n=3000,common=200 |     |      |           |            |            |             |             |                    |
|                      | DE  | nDE  | FP (%)    | TP (%)     | FN (%)     | TN (%)      | GlobalError | GlobalErr $R(q_2)$ |
| Case B1              | 292 | 2708 | 98 (3.5)  | 194 (97.0) | 6 (3.0)    | 2702 (96.5) | 104         | 53                 |
| Case B2              | 240 | 2760 | 144 (5.1) | 96 (48.0)  | 104 (52.0) | 2656 (94.9) | 249         | 138                |
| C: n=3000,common=100 |     |      |           |            |            |             |             |                    |
|                      | DE  | nDE  | FP (%)    | TP (%)     | FN (%)     | TN (%)      | GlobalError | GlobalErr $R(q_2)$ |
| Case C1              | 203 | 2797 | 105 (3.6) | 97 (97.0)  | 3 (3.0)    | 2795 (96.4) | 108         | 56                 |
| Case C2              | 196 | 2804 | 149 (5.1) | 47 (47.0)  | 53 (53.0)  | 2751 (94.9) | 201         | 84                 |

**Figure 2: Results from the VILI experiment**

The plots show the distribution of  $T(q)$  (left) and  $R(q)$  with the Bayesian Credibility Intervals at 95% (center). The right plot is a blow-up of the center one, showing the distribution for  $p$ -values between 0 and 0.2. The shape of  $T(q)$  and  $R(q)$  are similar, both exhibiting a monotone increase as  $p$ -values decrease. However, the Bayesian plot shows clearly how variability is taken into account, for small  $p$ -value the CIs becoming wider as the  $p$ -values decrease. The number of genes in common for each ratio is reported on the right axis of each plot.

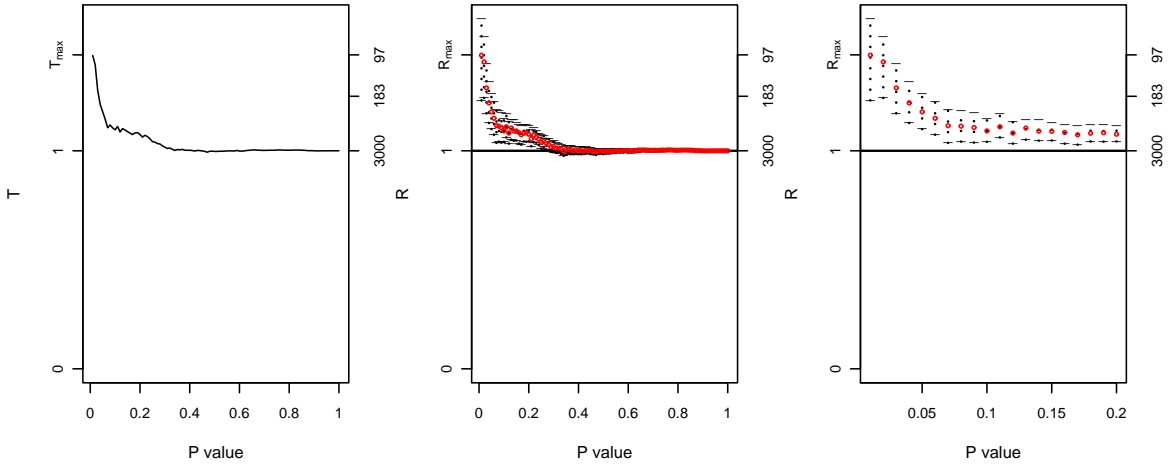

**Table 5: Results of the simulation on three experiments**

Average results from 50 simulation on three lists for the joint model: we report the three rules  $R(q_{max})$  and  $R(q_2)$ . The first presents a small global error and no FP; the second has still few FP and the number of genes in common  $O_{111}$  is close to the true number set up in the simulation (200 for B1 and 100 for C1).

| B: n=3000, common=200, DE1=700, DE2=600, DE3=500 |        |      |       |             |           |           |           |           |          |           |            |              |                                   |
|--------------------------------------------------|--------|------|-------|-------------|-----------|-----------|-----------|-----------|----------|-----------|------------|--------------|-----------------------------------|
| Parameters                                       | Rules  | q    | R     | 95%CI       | $O_{111}$ | $O_{1++}$ | $O_{+1+}$ | $O_{++1}$ | FP (%)   | TP (%)    | FN (%)     | TN (%)       | Glob.Err.                         |
| Case B1                                          | max    | 0.01 | 35.26 | 24.54-47.92 | 18        | 187       | 170       | 143       | 0 (0.0)  | 18 (9.0)  | 182 (91.0) | 2800 (100.0) | 182                               |
| Signal to noise ratio = 1.6 <sup>b</sup>         | double | 0.17 | 2.04  | 1.76-2.34   | 92        | 736       | 761       | 727       | 32 (1.1) | 60 (30.0) | 140 (70.0) | 2768 (98.9)  | 172<br><i>Min<sup>c</sup>=162</i> |
| C: n=3000, common=100, DE1=500, DE2=400, DE3=300 |        |      |       |             |           |           |           |           |          |           |            |              |                                   |
| Parameters                                       | Rules  | q    | R     | 95%CI       | $O_{111}$ | $O_{1++}$ | $O_{+1+}$ | $O_{++1}$ | FP (%)   | TP (%)    | FN (%)     | TN (%)       | Glob.Err.                         |
| Case C1                                          | max    | 0.01 | 45.13 | 26.20-70.55 | 9         | 188       | 120       | 80        | 0 (0.0)  | 9 (9)     | 91 (91)    | 2900 (100.0) | 91                                |
| Signal to noise ratio = 1.6 <sup>b</sup>         | double | 0.15 | 2.11  | 1.71-2.56   | 52        | 682       | 605       | 536       | 16 (0.5) | 36 (36.0) | 64 (64.0)  | 2884 (99.5)  | 80<br><i>Min<sup>c</sup>=80</i>   |

<sup>b</sup> The signal to ratio is calculated as  $E(Ga(shape, 1/scale))/(r_1/3 + r_2/3 + r_3/3)$

<sup>c</sup> Minimum global error (observed)

**Table 6: Comparing results on correlated and independent set of genes**

Results of our methodology for 50 simulations on correlated sets of genes and on independent sets of genes. Treating a correlated sets of genes with our method inflates the estimates of the ratio under both conditional and joint model for small  $p$ -values. Hence, the threshold  $q_2$  is larger than the one for the simulation of independent sets of genes (0.04 vs 0.02). In terms of specificity, sensitivity and global misclassification error we do not find large differences between the two cases.

| <b>n=3000,common=700, DE1=1000, DE2=800;</b><br><b>quartiles for correlation matrix in the first experiment: -0.86, -0.22, 0.01, 0.25, 0.85;</b><br><b>quartiles for correlation matrix in the second experiment: -0.96, -0.27, 0.00, 0.28, 0.97</b> |      |      |           |     |     |     |          |            |            |             |           |
|------------------------------------------------------------------------------------------------------------------------------------------------------------------------------------------------------------------------------------------------------|------|------|-----------|-----|-----|-----|----------|------------|------------|-------------|-----------|
| Rules                                                                                                                                                                                                                                                | q    | R    | CI        | O11 | O1+ | O+1 | FP (%)   | TP (%)     | FN (%)     | TN (%)      | GlobalErr |
| max                                                                                                                                                                                                                                                  | 0.01 | 2.68 | 2.12-3.24 | 45  | 292 | 173 | 2 (0.1)  | 43 (6.1)   | 657 (93.9) | 2298 (99.9) | 659       |
| double                                                                                                                                                                                                                                               | 0.04 | 2.02 | 1.83-2.23 | 146 | 566 | 387 | 8 (0.3)  | 138 (19.7) | 562 (80.3) | 2292 (99.7) | 570       |
| <i>Min<sup>c</sup> = 560</i>                                                                                                                                                                                                                         |      |      |           |     |     |     |          |            |            |             |           |
| <b>n=3000,common=700, DE1=1000, DE2=800;</b><br><b>independence for the set of genes in the first experiment</b><br><b>independence for the set of genes in the second experiment</b>                                                                |      |      |           |     |     |     |          |            |            |             |           |
| Rules                                                                                                                                                                                                                                                | q    | R    | CI        | O11 | O1+ | O+1 | FP (%)   | TP (%)     | FN (%)     | TN (%)      | GlobalErr |
| max                                                                                                                                                                                                                                                  | 0.01 | 2.21 | 1.9-2.52  | 84  | 384 | 295 | 6 (0.3)  | 78 (11.2)  | 622 (88.8) | 2294 (99.7) | 628       |
| double                                                                                                                                                                                                                                               | 0.02 | 2.01 | 1.8-2.22  | 128 | 498 | 384 | 14 (0.6) | 113 (16.2) | 587 (83.8) | 2286 (99.4) | 601       |
| <i>Min<sup>c</sup> = 554</i>                                                                                                                                                                                                                         |      |      |           |     |     |     |          |            |            |             |           |

<sup>c</sup> Minimum global error (observed)

**Figure 3: Credibility Intervals for correlated and independent set of genes**

The plot shows the credibility intervals at 95% for  $R(q)$ , obtained using our joint model for the simulated scenario of correlated sets of genes (black) and the uncorrelated one (brown). It is clear that applying our methodology to correlated sets of genes results in an inflation of the estimates for small  $p$ -values. After 0.15 on the  $p$ -value scale the two sets of  $CI$ s overlap completely.

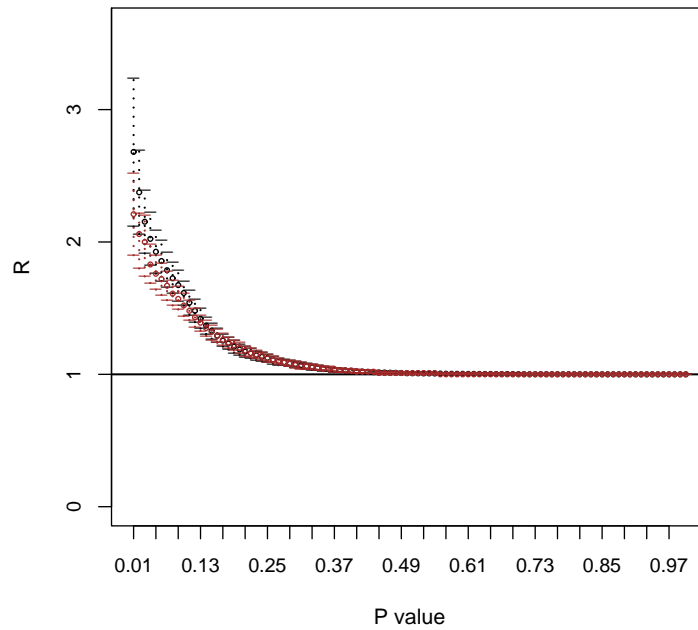

Supplement: Additional file 1 [file gb-2007-8-4-r54-s1.pdf]
